# Supplementary material for: The effects of sex and gender attributes on functional outcomes: A systematic review
Source: Research Square preprint supplement (doi:10.21203/rs.3.rs-7411540/v1), 2025-09-25
Supplement: Supplementary file 1 [file 720913f4c1851fc6283a3092.docx]

# Supplementary File 4. Reviewer disagreement and consensus during quality appraisal

| **Citation(s)** | **Disagreement** | **Consensus** |
| --- | --- | --- |
| N/A - multiple studies | Different interpretations of the criteria and definition of ‘eligible persons’ - criteria 3 | Resolved via discussion and agreed on mutual definition of ‘eligible population’ as the entirety of the initially sampled population |
| McLaughlin K, Muldoon OT, Moutray M. Gender, gender roles and completion of nursing education: A longitudinal study. Nurse Education Today. 2010 May;30(4):303–7. | Different interpretations of criteria 7 | Resolved via discussion and mutual agreement |
| Zeldow P, Daugherty S, Clark D. Masculinity, Femininity, and Psychosocial Adjustment in Medical Students: A 2-Year Follow-Up. J Pers Assess. 1987;51:3–14. | Error checking (N vs Y) - criteria 2 | Reviewers agreed on rating after review of article description of study population |
