# Supplementary material for: The effects of sex and gender attributes on functional outcomes: A systematic review
Source: Research Square preprint supplement (doi:10.21203/rs.3.rs-7411540/v1), 2025-09-25
Supplement: Supplementary file 2 [file 8e331dc71bbfedd0d0844865.docx]

# Supplementary File 5. Statistical analysis of all included studies investigating effect of gender attributes on functional outcomes

| Author (year);  Journal;  Country; Region;  City; Location of research; Study Quality: Fair, Good, Excellent | 1. Gender scores 2. Outcome scores 3. Results of statistical analysis |
| --- | --- |
| 1. Helgeson VS. (1991); *Psychosom Med;* USA; Colorado/New York; Denver/Long Island; Hospital; Fair | 1. Descriptive data NR 2. Descriptive data NR 3. Regression analysis: **rehospitalization** (sex NS; masc NS; Peel index β=.11, *p*=.01; spouse disclosure β=-1.09, *p*=.01) |
| 1. Kerr P, et al. (2021); *J Psychosom Res;* Canada; Quebec; Montreal; Community; Good | 1. BSRI fem/masc mean (SE): 5.98 (0.04)/4.56 (0.05); **F**, 6.02 (0.05)/4.52 (0.06); **M,** 5.85 (0.07)/4.67 (0.09) 2. MBI mean (SE): 25.47 (0.83); **F,** 25.88 (0.94); **M,** 24.39 (1.71) 3. Structural equation model: **burnout**, masc (β=-.17, z=-2.67, *p*=.008), fem (β=-.14, z=-2.17, *p*=.03) |
| 1. Kuntsche A, et al. (2019); *Drug Alcohol Depend;* Switzerland; Community; Good | 1. ATWS, %trad GRA: **M** 42.3%, **F** 52.8% 2. Alcohol freq, mean±SD: **M** 148.3±114.7 days, **F** 79.1±85.8 days; alcohol quantity, mean±SD: **M** 31.9±20.6g, **F** 20.3±13.7g 3. Regression analysis: **alcohol freq**, GRA (M, β=.366, *p*<.05; F, NS, *p*>.05); WFC*GRA (M, β=-.370, *p<*.05; F, NS, *p*>.05); **alcohol quantity**, GRA (M, NS, *p*>.05; F, β.376, *p*<.01); WFC*GRA (M, NS, *p*>.05; F, β=-.336, *p*<.05) |
| 1. Lu YM, et al. (2022);  *J Back Musculoskelet;*Taiwan; Kaohsiung; Hospital; Good | 1. Distrib (n,%) for M: masc=12 (28.6%), fem=4 (9.5%), adg=12 (28.6%), UD=14 (33.3%), F: masc= 8 (15.7%), fem= 14 (27.5%), adg=17 (33.3%), UD= 12 (23.5%) 2. Mean±SD VAS Score for back: M= 3.0±2.5, F= 3.5±2.5; Mean±SD VAS score for leg: M= 2.8±2.7 F= 2.6±2.4; Mean±SD ODI score: M= 29.2% ±20.7, F= 37.3 % ±19.7, Masc= 30.7% ±17.8, Fem= 37.8% ±22.2, Adg= 30.1% ±21.5, UD= 37.1% ±20.2; Domains of SF-36, mean±SD: PF= 50.9±25.9, RP= 37.4±45.1, BLP= 54.2±24.0, GH= 52.6±18.7, VT= 56.1±18.6, SF= 66.1±22.2, RE= 50.7±47.0, MH= 63.0±17.7 3. ANOVA: sig group differences in GRO in RP (p=0.03), VT (p<0.001), SF (p=0.045, REL (p=0.007) & MH (0.01); Post-hoc analysis: sig difference (p<0.05) b/w masc & UD for RP, VT, SF, REL & MH, sig difference (p<0.05) b/w adg & UD for VT, REL, MH |
| 1. McHale S, et al. (1984);  *Monogr Soc Res Child Dev;* USA; Pennsylvania; Community; Fair | 1. PAQ mean±SD: F/mother, fem= 25.5 ± 3.7, masc =18.8± 4.1; M/father, fem=23.1± 3.4, masc= 23.2 ± 4 ATWS mean±SD: F= 28.8 ± 8.7; M= 26.6± 6 2. Descriptive data NR 3. Correlations of Characteristics w Level of Child-Involvement (Total score): F/mother, masc, r= -0.24, NS fem, r=0.19, NS; M/father, masc, r= -0.11, NS, fem, r= 0.23, NS |
| 1. McLaughlin K, et al. (2010);  *Nurs Educ Today;*  United Kingdom; Ireland; School; Fair | 1. Descriptive data NR 2. Total course completion (N, %)= 307, 88% 3. Logistic regression: sig. predictor of course completion was gendered view of nursing, participants who believed the gender-neutral careers were more appropriate for both M & F were most likely to   withdraw (b = .166, p < 0.01). |
| 1. Milner A, et al. (2018);  27.25, 27.48   *Am J Mens Health;*  Australia; Victoria; Melbourne; Community; Excellent | 1. Total sample, Mean score: 27.32, CI95% [27.25, 27.48] 2. Total sample, Mean score: 50,64, CI95% [50.46,50.81) 3. Multiple linear regression models’ effects of CMNI-22 on SF-12 – MH Subscale [β, CI95%, p value], Total scale= [-0.17, -0.20, -0.13, < .001], Emotional control= [−0.42,−0.57, −0.29,< .001], Pursuit of status=[0.04, −0.23, 0.14, .65], Playboy= [−0.75,−0.90, −0.61] < .001], Heterosexual presentation=[0.04, 0.07, 0.16, .450], Dominance=[−0.20, −0.38, 0.03, .020], Power over women=−0.41, −0.60, −0.24, < .001], Risk taking= −0.02,−0.18, 0.14, .830], Winning=[−0.36, −0.52, −0.18, .010], Reliance= [−1.50, −1.66, −1.33, < .001], Violence=−0.48,−0.60, −0.36],< .001], Work={0.37,0.22, 0.53, < .001} |
| 1. Po Yee Lo I, et al. (2019);  *Arch Sex Behav;*  United Kingdom; Oxford; USA; Louisiana; Texas; Arlington; Victoria; Abbotsford; Community; Excellent | 1. Descriptive data NR 2. Descriptive data NR 3. ANOVA, mean scores: masc, self-est = 3± 0.47; fem, self-est = 2.70±0.49; Adg, self-est = 3.03±0.47; UD, self-est = 2.67±0.49; Path model, direct effect: (V1*→*V2)=(β, SE, t, p-value), Masc→ self-est *=* (.17, .06, 2.74, .006); Fem→ self-est = (− .17, .06, − 2.65, .008); Adg → self-est = (.22, .06 3.67, <.001) |
| 1. Schopp C, et al. (2011);  *Brain Injury;*  Australia; Victoria; Abbotsford; Hospital; Fair | 1. CMNI subscales mean±SD: winning, emotional control, risk-taking, violence, power over women, dominance, playboy, self-reliance, primacy of work, pursuit of status= 14.6(±3.7), 15.1(±5.2), 13.9(±4.5), 9.9(±4.8). 8.7(±3.7), 4.6(±2), 13.7(±6.4), 6.3(±3), 10.8(±3.4), 10(±2.2)   GRCS subscales mean±SD: PSC, RE, CWF= 45.5(±11.3), 33.7(±11.9), 18.3(±6.3)   1. Mean±SD for all values, FIM at d/c : 103.1(±17.9), FIM from adm to d/c: 57.2(±23.1), FIM from adm to f/u: 47.4(± 22.6); SFS: 19.6(±8.8) 2. Correlations b/w CMNI & SLS, FIM from adm to d/c, FIM from adm to f/u, *p<0.05, **p<0.01: CMNI total=-0.12, -0.15, 0.11; winning= -0.17, 0.38*, 0.39; risk-taking=-0.18, 0.2, 0.16; violence=0.01, 0.02, -0.03; power over women= -0.53*, -0.35, -0.04; dominance=-0.01, .01, .13; playboy= -0.44*, -0.2, -0.1; self-reliance=-0.37, -0.29, -0.03; primacy of work=.12, -0.12, -0.02; pursuit of status=.02, .41*, .4 |
| 1. Zeldow PB, et al. (1987); *J Pers Assess;* USA;  Illinois; Chicago; Community; Fair | 1. PAQ mean±SD: masc = 21.86 (±4.42), fem=23.65(±3.75) 2. RSES mean±SD: 6.45(±0.82); 3.86(±0.46); alcohol use, mean±SD: 2.40(±3.35), drug use, (distri, n, % )= 23, 20% 3. Correlations: masc*self-est (0.38, p<0.01), masc* alcohol use (-0.1, NS); fem*self-est (.08, NS), fem*alcohol use (-.24, p<0.05)   Max likelihood  logit regression (χ2, p value, alcohol use/drug use): masc (.66, NS/.01, NS); fem (1.52, NS/5.2, .023) |

*Note:* In this table we have used the terms ‘sex’, ‘male’ & ‘female’ when researchers reported results based on biological attributes of their participants, regardless of the term used in the original text. The use of the term ‘primary predictor’ does not imply causality but identifies the predictor as a main factor possibly associated with an outcome.

*Abbreviations:* **Adg**, androgynous; **Adm**, admission; **ANOVA**, analysis of variance; **ATWS**, Attitude Toward Women Scale; **BLP**, bodily pain; **BSRI**, Bem Sex Role Inventory; **CI**, confidence interval; **CMNI**, Conformity to Masculine Norms Inventory; **CWF**, conflict between work & family (GRCS subscale); **D/c**, discharge; **F**, females; **F/u**, follow-up; **Fem**, femininity; **FIM**, Functional Independence Measure; **GRA**, gender-role attitudes; **GRCS**, Gender Role Conflict Scale; **GRO**, gender role orientation; **M**, males; **Masc**, masculinity; **MBI**, Maslach Burnout Inventory; **MH**, mental health; **NS**, non-significant; **ODI**, Oswestry Disability Index; **PAQ**, Personal Attributes Questionnaire; **PF**, physical functioning; **PSC**, power, success and competition (GRCS subscale); **RE**, restricted emotionality (GRCS subscale); **REL**, role-emotional; **RP**, role-physical; **RSES**, Rosenburg Self-Esteem Scale; **Self-est,** self-esteem; **SF**, social functioning; **SFS**, Satisfaction with Life Scale; **Sig**, significant; **Trad**, traditional; **UD**, undifferentiated; **VAS**, visual analog scale; **VT**, vitality; **WFC**, work-family conflict
